# Supplementary material for: A Re-Evaluation of African Swine Fever Genotypes Based on p72 Sequences Reveals the Existence of Only Six Distinct p72 Groups
Source: MDPI journal article supplement (doi:10.3390/v15112246), 2023-11-11
Supplement: s1 [file s1]

|                                    |            |            |            |            |             |            |             |             |            |     |  |
|------------------------------------|------------|------------|------------|------------|-------------|------------|-------------|-------------|------------|-----|--|
|                                    |            | 280        |            | 300        |             | 320        |             | 340         |            | 360 |  |
| Benin_97/1_ (Genotype_I)           | ACCTTTGGTA | TTCCCCAGTA | CGGAGACTTT | TTCCATGATA | TGGTGGGGCCA | CCATATATTG | GGTGCATGTC  | ATTTCGTCCTG | GCAGGATGCT | 360 |  |
| ASFV_Georgia_2007/1_ (Genotype_II) | .....      | .....      | .....      | .....      | .....       | T.....     | .....       | .....A..... | .....      | 360 |  |
| Warmbaths_ (Genotype_III)          | .....      | .....      | .....      | .....      | .....       | T.....     | .....       | .....       | .....      | 360 |  |
| Warthog_ (Genotype_IV)             | .....      | .....      | .....      | .....      | .....       | T.....     | .....       | .....       | .....      | 360 |  |
| Tengani_62_ (Genotype_V)           | .....      | .....      | .....      | .....      | .....       | T.....     | .....       | .....       | .....      | 360 |  |
| MOZ/94/1_ (Genotype_VI)            | -----      | -----      | -----      | -----      | -----       | -----      | -----       | -----       | -----      | -   |  |
| Mkuzi_1979_ (Genotype_VII)         | .....      | .....      | .....      | .....      | .....       | .....      | .....       | .....       | .....      | 360 |  |
| Malawi_Lil-20/1_ (Genotype_VIII)   | ..T.....   | ..T.....   | .....      | .....      | ..A.....    | ..G.....   | .....       | ..T.....    | .....      | 360 |  |
| Ken06.Bus_ (Genotype_IX)           | .....      | .....      | .....      | .....      | ..A.....    | .....      | ..C..G..... | ..C.....    | .....      | 360 |  |
| Kenya_1950_ (Genotype_X)           | .....      | .....      | .....      | .....      | ..A.....    | .....      | ..G.....    | ..C.....    | .....      | 360 |  |
| KAB/62_ (Genotype_XI)              | -----      | -----      | -----      | -----      | -----       | -----      | -----       | -----       | -----      | -   |  |
| MZI/921_ (Genotype_XII)            | -----      | -----      | -----      | -----      | -----       | -----      | -----       | -----       | -----      | -   |  |
| SUM/1411_ (Genotype_XIII)          | -----      | -----      | -----      | -----      | -----       | -----      | -----       | -----       | -----      | -   |  |
| NYA/12_ (Genotype_XIV)             | .....      | .....      | .....      | .....      | .....       | .....      | .....       | .....       | .....      | -   |  |
| TAN/08/Mazimbu_ (Genotype_XV)      | ..T.....   | .....      | T.....     | .....      | ..A.....    | .....      | .....       | ..C.....    | .....      | 360 |  |
| TAN/2003/2_ (Genotype_XVI)         | -----      | -----      | -----      | -----      | -----       | -----      | -----       | -----       | -----      | -   |  |
| ZIM/92/1_ (Genotype_XVII)          | -----      | -----      | -----      | -----      | -----       | -----      | -----       | -----       | -----      | -   |  |
| NAM/1/95_ (Genotype_XVIII)         | -----      | -----      | -----      | -----      | -----       | -----      | -----       | -----       | -----      | -   |  |
| SPEC/251_ (Genotype_XIX)           | -----      | -----      | -----      | -----      | -----       | -----      | -----       | -----       | -----      | -   |  |
| Pretoriuskop/96/4_ (Genotype_XX)   | .....      | .....      | .....      | .....      | .....       | T.....     | .....       | .....       | .....      | 360 |  |
| RSA/1/96_ (Genotype_XXI)           | -----      | -----      | -----      | -----      | -----       | -----      | -----       | -----       | -----      | -   |  |
| SPEC/245_ (Genotype_XXII)          | -----      | -----      | -----      | -----      | -----       | -----      | -----       | -----       | -----      | -   |  |
| ETH/017_ (Genotype_XXIIa)          | .....      | .....      | .....      | .....      | ..A.....    | .....      | ..C.....    | ..C.....    | .....      | 360 |  |
| ETH/AA_ (Genotype_XXIIb)           | .....      | .....      | .....      | .....      | ..A.....    | .....      | ..C.....    | ..C.....    | .....      | 360 |  |
| MOZ_10/2006_ (Genotype_XXIV)       | -----      | -----      | -----      | -----      | -----       | -----      | -----       | -----       | -----      | -   |  |

Conservation

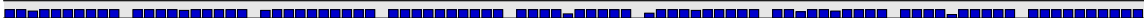

|                                   |                              |             |                 |            |                |            |            |            |            |                |     |
|-----------------------------------|------------------------------|-------------|-----------------|------------|----------------|------------|------------|------------|------------|----------------|-----|
|                                   | Benin_97/1_(Genotype_I)      | CCGATTTCAGG | GCACGGGCCCA     | GATGGGGGCC | CATGGTCAGC     | TTCAAACGTT | TCCTCGCAAC | GGATATGACT | GGGACAACCA | AACACCTTTA     | 450 |
| ASFV_Georgia_2007/1_(Genotype_II) |                              | .....       | .....T.....     | .....      | .....G.....    | .....      | .....      | .....      | .....      | .....C.....    | 450 |
|                                   | Warmbaths_(Genotype_III)     | .....       | .....AT.....    | .....      | .....C..G..... | .....      | .....      | .....      | .....      | .....          | 450 |
|                                   | Warthog_(Genotype_IV)        | .....       | .....T.....     | .....      | .....G.....    | .....      | .....      | .....      | .....      | .....          | 450 |
|                                   | Tengani_62_(Genotype_V)      | .....       | .....T.....     | .....      | .....G.....    | .....      | .....      | .....      | .....      | .....          | 450 |
|                                   | MOZ/94/1_(Genotype_VI)       | -----       | -----           | -----      | -----          | -----      | -----      | -----      | -----      | -----          | -   |
|                                   | Mkuzi_1979_(Genotype_VII)    | .....       | .....           | .....      | .....          | .....      | .....      | .....      | .....      | .....          | 450 |
| Malawi_Lil-20/1_(Genotype_VIII)   |                              | .....       | .....T..AT..... | .....      | .....          | .....      | .....      | .....      | .....      | .....          | 450 |
|                                   | Ken06.Bus_(Genotype_IX)      | .....       | .....T..AT..... | .....      | .....          | .....      | .....      | .....      | .....      | .....G.....    | 450 |
|                                   | Kenya_1950_(Genotype_X)      | .....       | .....T..AT..... | .....      | .....          | .....      | .....      | .....      | .....      | .....G.....    | 450 |
|                                   | KAB/62_(Genotype_XI)         | -----       | -----           | -----      | -----          | -----      | -----      | -----      | -----      | -----          | -   |
|                                   | MZI/921_(Genotype_XII)       | -----       | -----           | -----      | -----          | -----      | -----      | -----      | -----      | -----          | -   |
|                                   | SUM/1411_(Genotype_XIII)     | -----       | -----           | -----      | -----          | -----      | -----      | -----      | -----      | -----          | -   |
|                                   | NYA/12_(Genotype_XIV)        | .....       | .....           | .....      | .....          | .....      | .....      | .....      | .....      | .....          | -   |
|                                   | TAN/08/Mazimbu_(Genotype_XV) | .....       | .....T..AT..... | .....      | .....A.....    | .....      | .....      | .....      | .....      | .....          | 450 |
|                                   | TAN/2003/2_(Genotype_XVI)    | -----       | -----           | -----      | -----          | -----      | -----      | -----      | -----      | -----          | -   |
|                                   | ZIM/92/1_(Genotype_XVII)     | -----       | -----           | -----      | -----          | -----      | -----      | -----      | -----      | -----          | -   |
|                                   | NAM/1/95_(Genotype_XVIII)    | -----       | -----           | -----      | -----          | -----      | -----      | -----      | -----      | -----          | -   |
|                                   | SPEC/251_(Genotype_XIX)      | -----       | -----           | -----      | -----          | -----      | -----      | -----      | -----      | -----          | -   |
| Pretoriuskop/96/4_(Genotype_XX)   |                              | .....       | .....T.....     | .....      | .....G.....    | .....      | .....      | .....      | .....      | .....          | 450 |
|                                   | RSA/1/96_(Genotype_XXI)      | -----       | -----           | -----      | -----          | -----      | -----      | -----      | -----      | -----          | -   |
|                                   | SPEC/245_(Genotype_XXII)     | -----       | -----           | -----      | -----          | -----      | -----      | -----      | -----      | -----          | -   |
|                                   | ETH/017_(Genotype_XXIIa)     | .....A..... | .....AT.....    | .....      | .....G.....    | ..A.....   | .....      | .....      | .....      | .....C..G..... | 450 |
|                                   | ETH/AA_(Genotype_XXIIb)      | .....A..... | .....AT.....    | .....      | .....G.....    | ..A.....   | .....      | .....      | .....      | .....C..G..... | 450 |
|                                   | MOZ_10/2006_(Genotype_XXIV)  | -----       | -----           | -----      | -----          | -----      | -----      | -----      | -----      | -----          | -   |

Conservation

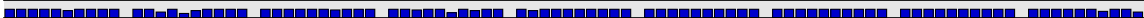

|                                    |            |            |                |                |                |                |             |             |            |     |
|------------------------------------|------------|------------|----------------|----------------|----------------|----------------|-------------|-------------|------------|-----|
|                                    |            | 460        |                | 480            |                | 500            |             | 520         |            | 540 |
| Benin_97/1_ (Genotype_I)           | GAGGGCGCCG | TTTACACGCT | TGTAGATCCC     | TTTGAAGAC      | CTATTGTACC     | CGGCACAAAG     | AATGCGTACC  | GAAACTTGGT  | TTACTACTGC | 540 |
| ASFV_Georgia_2007/1_ (Genotype_II) | .....      | .....      | .....T.....    | .....          | ..C.....       | .....          | .....       | .....       | .....      | 540 |
| Warmbaths_ (Genotype_III)          | .....      | .....      | .....T.....    | .....          | ..C.....       | .....          | .....       | .....       | .....      | 540 |
| Warthog_ (Genotype_IV)             | .....      | .....      | .....T.....    | .....          | ..C.....       | .....          | .....       | .....       | .....      | 540 |
| Tengani_62_ (Genotype_V)           | .....      | .....      | .....T.....    | .....          | ..C.....       | .....          | .....A..... | .....T..... | .....      | 540 |
| MOZ/94/1_ (Genotype_VI)            | -----      | -----      | -----          | -----          | -----          | -----          | -----       | -----       | -----      | -   |
| Mkuzi_1979_ (Genotype_VII)         | .....      | .....      | .....          | .....          | .....          | .....          | .....       | .....       | .....      | 540 |
| Malawi_Lil-20/1_ (Genotype_VIII)   | ..A.....   | .....      | ..G.....T..... | .....G.....    | ..C.....C..... | .....          | .....       | .....       | .....      | 540 |
| Ken06.Bus_ (Genotype_IX)           | .....      | .....      | ..G.....T..... | .....G..G..... | .....          | ..G.....T..... | .....       | .....       | .....      | 540 |
| Kenya_1950_ (Genotype_X)           | .....      | .....      | ..G.....T..... | .....G..G..... | ..C.....       | .....          | .....       | .....       | .....      | 540 |
| KAB/62_ (Genotype_XI)              | -----      | -----      | -----          | -----          | -----          | -----          | -----       | -----       | -----      | -   |
| MZI/921_ (Genotype_XII)            | -----      | -----      | -----          | -----          | -----          | -----          | -----       | -----       | -----      | -   |
| SUM/1411_ (Genotype_XIII)          | -----      | -----      | -----          | -----          | -----          | -----          | -----       | -----       | -----      | -   |
| NYA/12_ (Genotype_XIV)             | .....      | .....      | .....          | .....          | .....          | .....          | .....       | .....       | .....      | 540 |
| TAN/08/Mazimbu_ (Genotype_XV)      | ..A.....   | .....      | ..G.....T..... | .....          | ..C.....       | .....T.....    | .....       | .....       | .....      | 540 |
| TAN/2003/2_ (Genotype_XVI)         | -----      | -----      | -----          | -----          | -----          | -----          | -----       | -----       | -----      | -   |
| ZIM/92/1_ (Genotype_XVII)          | -----      | -----      | -----          | -----          | -----          | -----          | -----       | -----       | -----      | -   |
| NAM/1/95_ (Genotype_XVIII)         | -----      | -----      | -----          | -----          | -----          | -----          | -----       | -----       | -----      | -   |
| SPEC/251_ (Genotype_XIX)           | -----      | -----      | -----          | -----          | -----          | -----          | -----       | -----       | -----      | -   |
| Pretoriuskop/96/4_ (Genotype_XX)   | .....      | .....      | .....T.....    | .....          | ..C.....       | .....          | .....       | .....       | .....      | 540 |
| RSA/1/96_ (Genotype_XXI)           | -----      | -----      | -----          | -----          | -----          | -----          | -----       | -----       | -----      | -   |
| SPEC/245_ (Genotype_XXII)          | -----      | -----      | -----          | -----          | -----          | -----          | -----       | -----       | -----      | -   |
| ETH/017_ (Genotype_XXIIa)          | .....      | .....      | ..G.....T..... | .....G.....    | ..C.....       | .....          | .....       | .....       | .....      | 540 |
| ETH/AA_ (Genotype_XXIIb)           | .....      | .....      | ..G.....T..... | .....G.....    | ..C.....       | .....          | .....       | .....       | .....      | 540 |
| MOZ_10/2006_ (Genotype_XXIV)       | -----      | -----      | -----          | -----          | -----          | -----          | -----       | -----       | -----      | -   |

Conservation

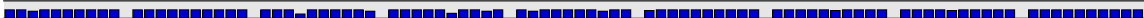

[illegible]



[illegible]





|                                   | 1,900               |                     | 1,920               |                     | 1,940               |        |
|-----------------------------------|---------------------|---------------------|---------------------|---------------------|---------------------|--------|
| Benin_97/1_(Genotype_I)           | A A C T T T C T T C | T T C T T C A G A A | C G G T T C A G C T | G T G C T G C G T T | A C A G T A C C T A | A 1941 |
| ASFV_Georgia_2007/1_(Genotype_II) | .....               | .....               | .....               | .....               | .....               | 1941   |
| Warmbaths_(Genotype_III)          | .....               | .....               | T.....              | .....               | .....               | 1941   |
| Warthog_(Genotype_IV)             | .....               | .....               | .....               | .....               | .....               | 1941   |
| Tengani_62_(Genotype_V)           | .....               | .....               | T.....              | .....               | .....               | 1941   |
| MOZ/94/1_(Genotype_VI)            | .....               | .....               | .....               | .....               | .....               | 417    |
| Mkuzi_1979_(Genotype_VII)         | .....               | .....               | .....               | .....               | .....               | 1941   |
| Malawi_L11-20/1_(Genotype_VIII)   | .....               | .....               | T.....              | .....               | .....               | 1941   |
| Ken06.Bus_(Genotype_IX)           | .....               | .....               | T.....              | T.....              | .....               | 1941   |
| Kenya_1950_(Genotype_X)           | .....               | .....               | T.....              | T.....              | C.....              | 1941   |
| KAB/62_(Genotype_XI)              | .....               | .....               | .....               | .....               | .....               | 417    |
| MZI/921_(Genotype_XII)            | .....               | .....               | .....               | .....               | .....               | 417    |
| SUM/1411_(Genotype_XIII)          | .....               | .....               | .....               | .....               | .....               | 417    |
| NYA/12_(Genotype_XIV)             | .....               | .....               | .....               | .....               | .....               | 417    |
| TAN/08/Mazimbu_(Genotype_XV)      | .....               | .....               | T.....              | .....               | .....               | 1941   |
| TAN/2003/2_(Genotype_XVI)         | .....               | .....               | .....               | .....               | .....               | 417    |
| ZIM/92/1_(Genotype_XVII)          | .....               | .....               | .....               | .....               | .....               | 411    |
| NAM/1/95_(Genotype_XVIII)         | .....               | .....               | .....               | .....               | .....               | 411    |
| SPEC/251_(Genotype_XIX)           | .....               | .....               | .....               | .....               | .....               | 411    |
| Pretoriuskop/96/4_(Genotype_XX)   | .....               | .....               | T.....              | .....               | .....               | 1941   |
| RSA/1/96_(Genotype_XXI)           | .....               | .....               | .....               | .....               | .....               | 411    |
| SPEC/245_(Genotype_XXII)          | .....               | .....               | .....               | .....               | .....               | 411    |
| ETH/017_(Genotype_XXIIIa)         | .....               | .....               | T.....              | T.....              | .....               | 1941   |
| ETH/AA_(Genotype_XXIIIb)          | .....               | .....               | T.....              | T.....              | .....               | 1941   |
| MOZ_10/2006_(Genotype_XXIV)       | .....               | .....               | .....               | .....               | .....               | 399    |
| Conservation                      |                     |                     |                     |                     |                     |        |
